# Supplementary material for: Theoretical characterization of a series of N5-based aromatic hyperhalogen anions
Source: Royal Society of Chemistry journal article supplement (doi:10.1039/c5dt03575a), 2015-01-01

Electronic Supplementary Information for:

**Theoretical characterization of a series of N<sub>5</sub>-based aromatic  
hyperhalogen anions**

Wei-Ming Sun<sup>a,b</sup>, Dan-Hou<sup>a</sup>, Di Wu<sup>a</sup>, Xiang-Hui Li<sup>c</sup>, Ying Li<sup>a\*</sup>, Jing-Hua Chen<sup>b</sup>,  
Chun-Yan Li<sup>b</sup>, Zhi-Ru Li<sup>a</sup>

*<sup>a</sup>Institute of Theoretical Chemistry, Jilin University, Changchun 130023, People's Republic of  
China E-mail: [liyingedu@jlu.edu.cn](mailto:liyingedu@jlu.edu.cn)*

*<sup>b</sup>Faculty of Pharmacy, Fujian Medical University, Fuzhou 350108, People's Republic of China*

*<sup>c</sup>Medical Technology and Engineering College, Fujian Medical University, Fuzhou 350004,  
Fujian, China*

**Fig. S1** The HOMO orbital energies of  $N_5^-$  and  $M(N_5)_{k+1}^-$  ( $M = \text{Li, Be, and B}$ ) anions.

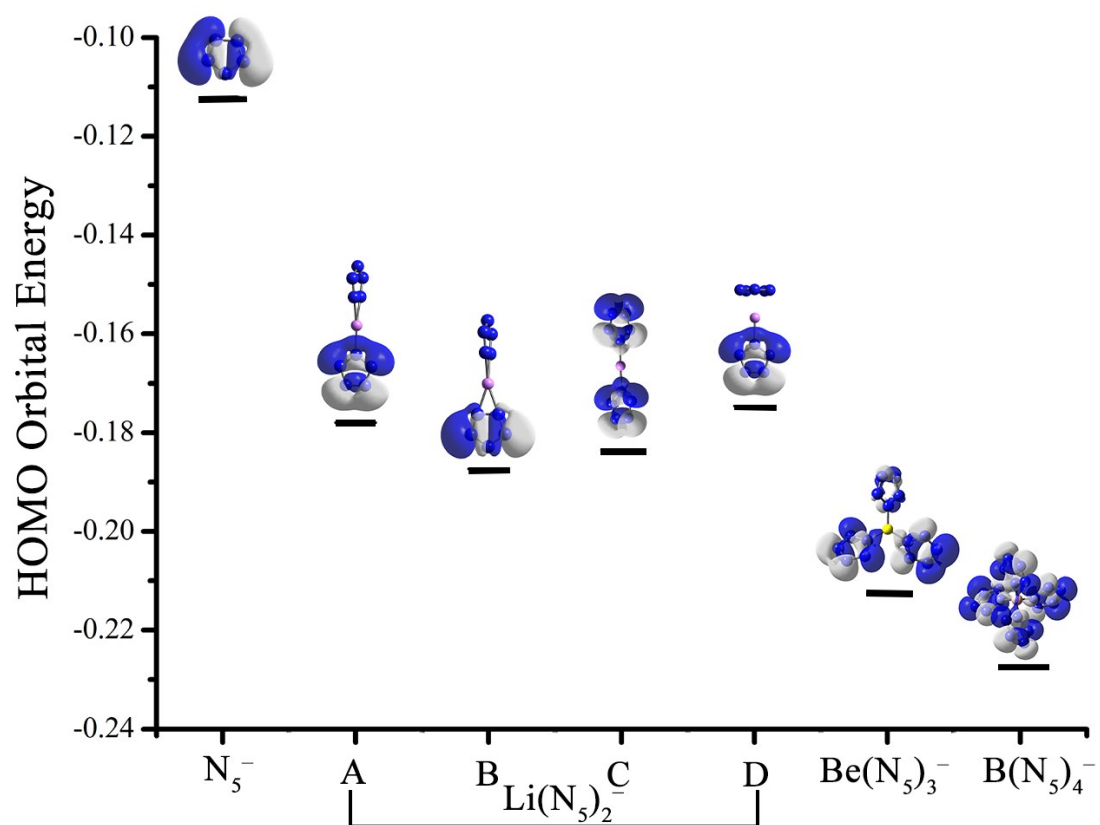

**Fig. S2.** Equilibrium structures of the  $M(N_5)_k$  ( $M = \text{Li}, \text{Be}, \text{and B}$ ) and  $M_2(N_5)_{2k}$  ( $M = \text{Li and Be}$ ) clusters at the B3LYP/6-311+G(3df) level.

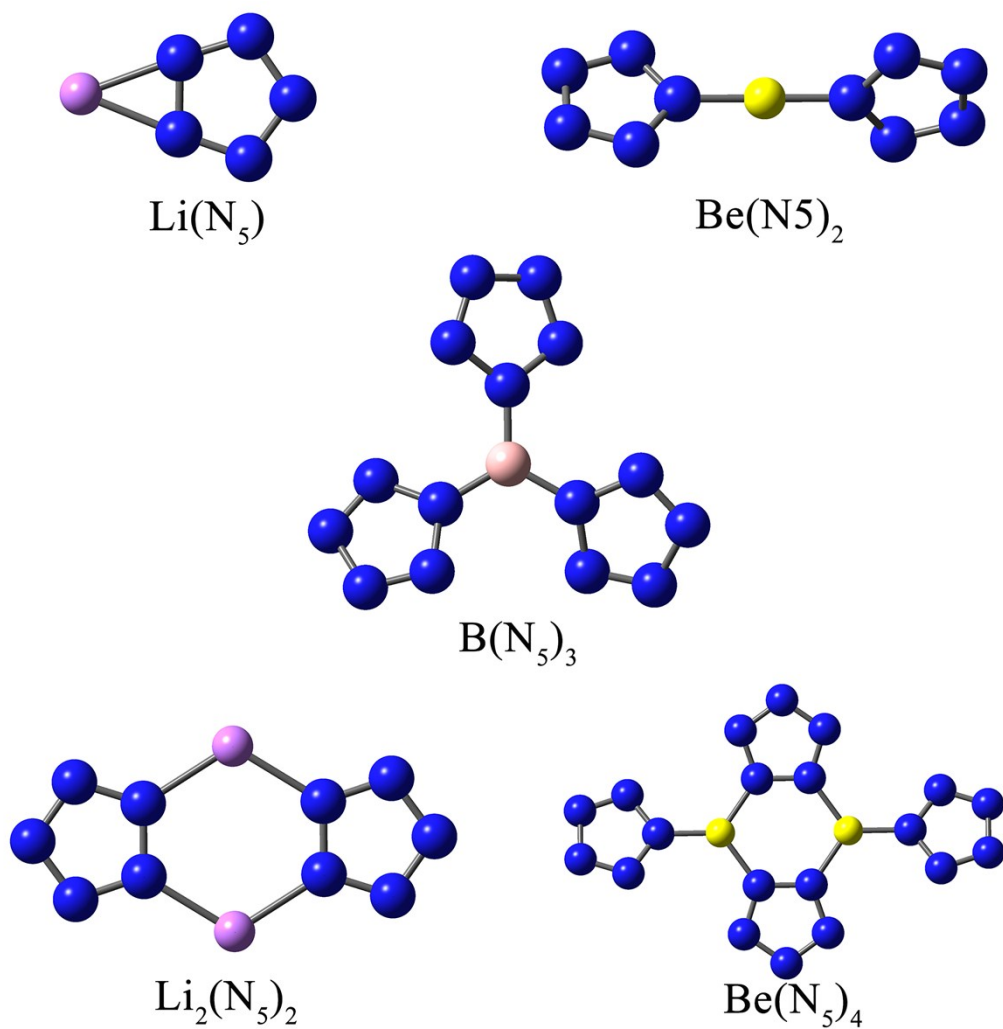

Supplement: c5dt03575a1.pdf [file c5dt03575a1.pdf]
